# Supplementary material for: Ancestral SARS-CoV-2-specific T cells cross-recognize Omicron (B.1.1.529)
Source: Research Square preprint supplement (doi:10.21203/rs.3.rs-1217466/v1), 2022-01-03
Supplement: Supplementary file 1 [file ddd8df6b9f53bd9bd6234f35.docx]

**Supplementary Table 1.** Flow cytometry reagents.

| Antigen | Clone | Fluorophore | Company | Panel |
| --- | --- | --- | --- | --- |
| Viability | N/A | Fixable Aqua | Thermo Fisher | Surface + intracellular |
| CCR7 | G043H7 | APC-Cy7 | BioLegend | Surface + intracellular |
| CD3 | UCHT1 | BUV805 | BD Biosciences | Surface + intracellular |
| CD4 | SK3 | BUV496 | BD Biosciences | Surface + intracellular |
| CD8 | RPA-T8 | BUV395 | BD Biosciences | Surface + intracellular |
| CD14 | M5E2 | BV510 | BioLegend | Surface + intracellular |
| CD19 | HIB19 | BV510 | BioLegend | Surface + intracellular |
| CD45RA | HI100 | BV570 | BioLegend | Surface + intracellular |
| CD137 | 4B4-1 | PE-Cy7 | BioLegend | Surface + intracellular |
| CD154 | 24-31 | BV391 | BioLegend | Surface + intracellular |
| CD194 | 1G1 | BB700 | BD Biosciences | Surface + intracellular |
| CD196 | 11A9 | BUV737 | BD Biosciences | Surface + intracellular |
| CXCR5 | RF8B2 | BB515 | BD Biosciences | Surface + intracellular |
| CD40 | HB14 | Unconjugated | Miltenyi Biotec | Surface |
| CD69 | FN50 | BV650 | BioLegend | Surface |
| CXCR3 | G025H7 | AF647 | BioLegend | Surface |
| CD69 | FN50 | BUV563 | BD Biosciences | Intracellular |
| CD107a | H4A3 | BV785 | BioLegend | Intracellular |
| CXCR3 | 1C6 | BV750 | BD Biosciences | Intracellular |
| GrzB | GB11 | BB790 | BD Biosciences | Intracellular |
| IFN-γ | B27 | PE | BioLegend | Intracellular |
| IL-2 | MQ1-17H12 | PE-Dazzle594 | BioLegend | Intracellular |
| PD-1 | EH12.2H7 | BV711 | BioLegend | Intracellular |
| TNF | MAb11 | BV650 | BD Biosciences | Intracellular |
